# Supplementary material
Source: PubMed Central journal article supplement (PMC2657416)
Supplement: 0900349106_0900349106SI.pdf [file 0900349106_0900349106SI.pdf]

# Supporting Information

Zhang et al. 10.1073/pnas.0900349106

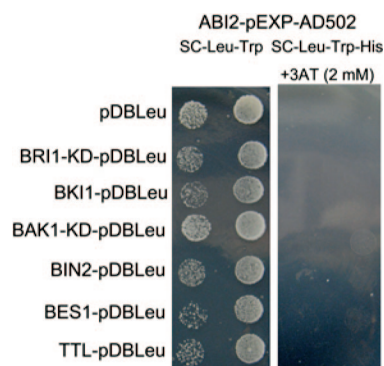

**Fig. S1.** ABI2 does not interact with several known components of BR signaling, including BRI1, BAK1, TTL, BK11, BIN2, and BES1, respectively, in yeast. *ABI2* was cloned into the pEXP-AD502. The kinase domains of BRI1 (BRI1-KD) and BAK1 (BAK1-KD) and the full-length of TTL, BK11, BIN2, and BES1 were cloned into the pDBLeu vector. Plasmids containing fusion proteins were cointroduced into *Saccharomyces cerevisiae* AH109 and were tested on SD medium lacking Leu, Trp, and His in the presence of 2 mM 3-amino-1,2,4-triazole (3AT). A ProQuest Two-Hybrid system with Gateway technology (Invitrogen) was used.

**Table S1. BR and ABA-related mutants used in this study**

| Mutants                     | Genetic background | Notes                                                               |
|-----------------------------|--------------------|---------------------------------------------------------------------|
| <i>det2-1</i>               | Col-0              | Steroid 5 $\alpha$ -reductase                                       |
| <i>bri1-301</i>             | Col-0              | A point mutation of <i>BRI1</i>                                     |
| <i>bri1-116</i>             | Col-0              | A null allele of <i>BRI1</i>                                        |
| <i>BK11-YFP-OX</i>          | Col-0              | Overexpression line of <i>BK11-YFP</i>                              |
| <i>BK11-YFP-OX/bri1-116</i> | Col-0              | Overexpression line of <i>BK11-YFP</i> in BR mutant <i>bri1-116</i> |
| <i>BRI1-GFP-OX</i>          | Col-0              | Overexpression line of <i>BRI1-GFP</i>                              |
| <i>aba1</i>                 | Ler                | Zeaxanthin epoxidase                                                |
| <i>aba2-1</i>               | Col-0              | Dehydrogenase/reductase                                             |
| <i>abi1</i>                 | Ler                | A serine/threonine phosphatase                                      |
| <i>abi2</i>                 | Ler                | A serine/threonine phosphatase                                      |
